# Supplementary material for: Early Impairment of Right Ventricular Systolic Function in Patients with Prediabetes and Type 2 Diabetes Mellitus: An Analysis of Two-dimensional Speckle Tracking Echocardiography
Source: Research Square preprint supplement (doi:10.21203/rs.3.rs-1287084/v1), 2022-02-28
Supplement: Supplementary file 1 [file 3822a242447489a4670ef734.xlsx]

## Sheet: Sheet1
Table 2 Comparison of echocardiographic data in the prediabetes group, diabetic group and control group
Parameter	controls(n=49)	Patients with prediabetes(n=43)	Patients with diabetes（n=52）	F	P value
	(mean ± SD)	(mean ± SD)	(mean ± SD)
LV end-diastolic diameter(mm)	45.86±3.82	46.00±4.22	44.50±4.39	1.969	0.143
LV end-systolic diameter(mm)	28.65±3.68	29.12±3.70	29.17±6.29	0.173	0.841
interventricular septal thickness(mm)	8.78±1.03*	9.12±1.03	9.62±1.05*	8.412	0
LV ejection fraction(%)	66.45±5.42	65.49±5.40	65.89±4.34	0.423	0.656
2D RV and RA parameters
RV diastolic diameter(mm)	31.20±4.71	30.79±5.35	31.67±5.07	0.364	0.696
RA diastolic diameter(mm)	33.98±2.91	34.44±3.20	34.80±2.78	0.991	0.374
TAPSE(mm)	20.76±2.73*	20.49±2.51	19.29±2.52*	4.561	0.012
RV 'S(cm/s)	12.80±1.68	12.25±1.24	12.35±2.12	1.308	0.274
FAC(%)	55.14±5.61*&	51.79±6.11&	51.48±6.994*	5.1	0.007
strain
LV global longitudianl stran(%)（LVGLS）	20.37±1.94	19.22±2.29	18.09±2.14	14.556	0.000$
RV global longitudinal strain(%)(RVGLS）	20.80±1.96	18.99±3.20	16.85±4.01	19.419	0.000$
RV free wall strain(RV-FWLS)	25.63±4.58*&	22.83±4.83&	20.79±4.92*	12.998	0
septum strain（RV LS of the septum	17.28±2.35*	16.14±3.22	15.53±3.33*	4.393	0.014
$P< .05 in comparison between any two groups.
&Controls versus patients with prediabetes (P< .05).
#Prediabetes versus patients with diabetes (P< .05).
*Controls versus patients with diabetes (P< .05).
