# Supplementary material for: Early Impairment of Right Ventricular Systolic Function in Patients with Prediabetes and Type 2 Diabetes Mellitus: An Analysis of Two-dimensional Speckle Tracking Echocardiography
Source: Research Square preprint supplement (doi:10.21203/rs.3.rs-1287084/v1), 2022-02-28
Supplement: Supplementary file 2 [file 6c97288206c81bdd773f98e1.xlsx]

## Sheet: Sheet1
Table 1 Clinical data for prediabetes, diabetes and control groups groups
Parameter	controls(n=49)	Patients with prediabetes(n=43)	Patients with diabetes（n=52）	F/ χ2	P value
	(mean ± SD)	(mean ± SD)	(mean ± SD)
Age(y)	52.29±11.15	56.44±10.58	55.04±11.57	1.682	0.19
Sex(male)	22(48.89%)	22（51.16%）	33(54.10%）	1.535	0.464
smoker(n,%)	14(31.82%)	15(33.33%)	21(38.18%)	0.492	0.782
BMI(kg/m²)	22.15±2.80*	23.40±3.95	24.29±3.31*	5.135	0.007
Heart rate(beats/min)	71.71±10.42	71.59±12.23	75.55±10.64	2.06	0.131
Clinic systolic BP(mmHg)	119.33±13.07&	126.51±13.27&	122.79±14.06	3.247	0.042
Clinic diastolic BP(mmHg)	74.08±8.94	76.37±8.67	75.95±15.84	0.502	0.606
HbA1c(%)	5.04±0.37	6.02±0.22	9.38±2.18	147.158	0.000$
Total holesterol(mmol/L)	4.67±1.11	5.10±1.93	4.74±1.12	1.107	0.334
Triglycerides(mmol/L)	1.42±0.58*	1.74±1.12	2.50±2.39*	6.112	0.003
Serum creatinineumol/L)	60.90±15.11	69.32±23.81	65.72±26.54	1.644	0.197
$P< .05 in comparison between any two groups.
*Controls versus patients with diabetes (P< .05).
&Controls versus patients with prediabetes (P< .05).
