# Supplementary material for: Early Impairment of Right Ventricular Systolic Function in Patients with Prediabetes and Type 2 Diabetes Mellitus: An Analysis of Two-dimensional Speckle Tracking Echocardiography
Source: Research Square preprint supplement (doi:10.21203/rs.3.rs-1287084/v1), 2022-02-28
Supplement: Supplementary file 3 [file 77ed81b9f5d61634323e1963.xlsx]

## Sheet: Sheet1
Table 3 Multivariate Regression Analysis for Predictors of RVGLS
Parameter	B	SE	P value
HbA1c(%)	-0.44	-6.628	0
septum strain	0.31	4.598	0
LV end-diastolic diameter(mm)	0.226	3.448	0.001
Sex(male)	-0.134	-2.048	0.043
