# Supplementary material for: Early Impairment of Right Ventricular Systolic Function in Patients with Prediabetes and Type 2 Diabetes Mellitus: An Analysis of Two-dimensional Speckle Tracking Echocardiography
Source: Research Square preprint supplement (doi:10.21203/rs.3.rs-1287084/v1), 2022-02-28
Supplement: Supplementary file 4 [file b549a1f84c43761df506841d.xlsx]

## Sheet: Sheet1
Table 5 AUC for various parameters of RV systolic function in diabetes
Parameter	AUC	P	95% CI
RVGLS	0.731	0	0.641-0.822
RV-FWLS	0.687	0	0.596-0.777
TAPSE	0.623	0.015	0.529-0.716
RVS	0.574	0.144	0.473-0.674
RVFAC	0.575	0.135	0.476-0.675
