# Supplementary material for: Early Impairment of Right Ventricular Systolic Function in Patients with Prediabetes and Type 2 Diabetes Mellitus: An Analysis of Two-dimensional Speckle Tracking Echocardiography
Source: Research Square preprint supplement (doi:10.21203/rs.3.rs-1287084/v1), 2022-02-28
Supplement: Supplementary file 5 [file e279a8ccb105d16bdce9cec3.xlsx]

## Sheet: Sheet1
Table 4 AUC for various parameters of RV systolic function in prediabetes
Parameter	AUC	P value	95% CI
RVGLS	0.689	0.002	0.574-0.803
RV-FWLS	0.671	0.005	0.559-0.783
TAPSE	0.539	0.521	0.420-0.658
RV-S'	0.51	0.873	0.390-0.630
RVFAC	0.64	0.021	0.5257-0.753
